# Supplementary material for: Platelet and Erythrocyte Membranes Coassembled Biomimetic Nanoparticles for Heart Failure Treatment
Source: PubMed Central journal article supplement — ACS Nano. 2024 Aug 22;18(39):26614–30. doi: 10.1021/acsnano.4c04814 (PMC11447889; doi:10.1021/acsnano.4c04814), 2024-08-22
Supplement: nn4c04814_si_001.pdf [file nn4c04814_si_001.pdf]

# Platelet and Erythrocyte Membranes Coassembled Biomimetic Nanoparticles for Heart Failure Treatment

Yuyu Li<sup>a,b</sup>#, Jiaqi Yu<sup>a,b</sup>#, Chen Cheng<sup>a,b</sup>; Weiyao Chen<sup>a,b</sup>; Rui Lin<sup>a,b</sup>; Yihao Wang<sup>a,b</sup>; Wei Cui<sup>b</sup>; Jiali Meng<sup>b</sup>; Jie Du<sup>a,b</sup>; Yuan Wang<sup>a,b</sup>\*

## Affiliations:

<sup>a</sup> Beijing Anzhen Hospital, Capital Medical University; Key Laboratory of Remodeling-related Cardiovascular Diseases, Ministry of Education; Beijing Collaborative Innovation Centre for Cardiovascular Disorders, No. 2 Anzhen Road, Chaoyang District, Beijing 100029, China

<sup>b</sup> Beijing Institute of Heart, Lung and Blood Vessel Disease, No. 2 Anzhen Road, Chaoyang District, Beijing 100029, China;

# Yuyu Li, Jiaqi Yu contributed equally to this article.

\*Correspondence to Yuan Wang.

Address for correspondence

Yuan Wang,

Tel.: +86-10-64456770

Email: wangyuan980510@ccmu.edu.cn

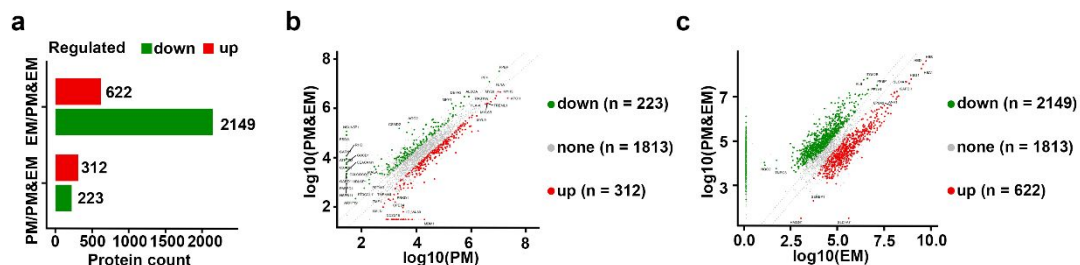

**Figure S1** **a** Up and down regulated protein counts in PM vesicles vs. PM&EM vesicles and EM vesicles vs. PM&EM vesicles. **b** Dot plot Up and down regulated protein counts in PM vesicles vs. PM&EM vesicles. **c** Dot plot Up and down regulated protein counts in EM vesicles vs. PM&EM vesicles.

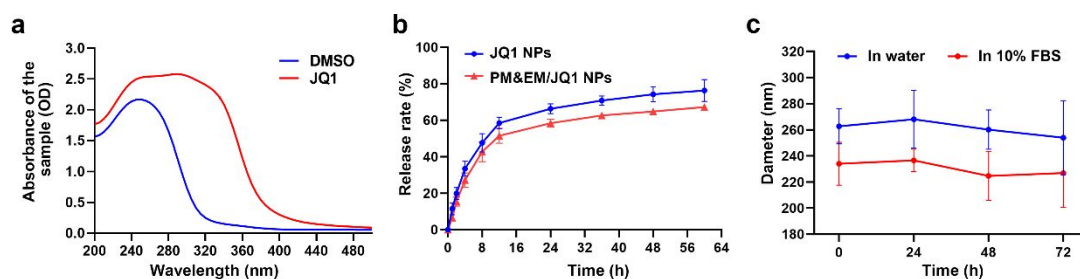

**Figure S2** **a** The full spectrums of JQ1 and DMSO. **b** JQ1 release profiles from JQ1 NPs and PM&EM/JQ1 NPs. **c** JQ1 diameter stability in water and 10% FBS.

PM&EM/JQ1 NPs over 64 h in 20% FBS at room temperature measured by a spectrophotometer at the wavelength of 320 nm (mean  $\pm$  SD,  $n = 3$  independent experiments). **c** The size change tendency of PM&EM/JQ1 NPs in water and medium containing 10% FBS at room temperature (mean  $\pm$  SD,  $n = 3$  independent experiments).

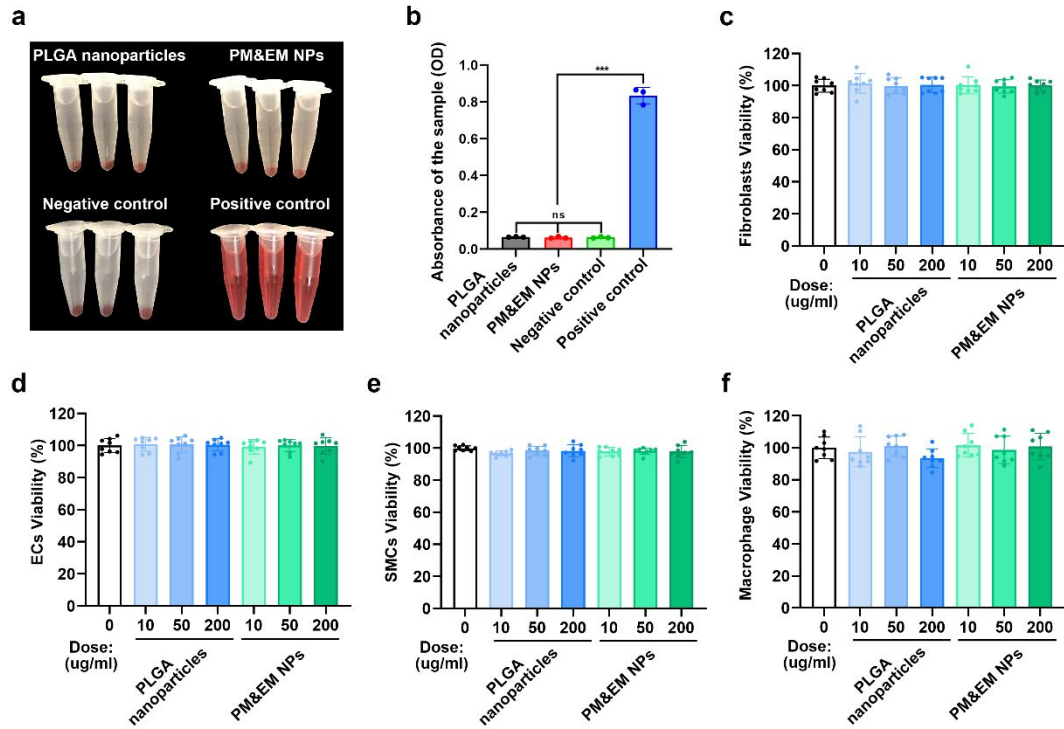

**Figure S3** Centrifuged red blood cells after incubation with PLGA NPs and PM&EM NPs. **a, b** The absorbance of the blood sample incubated with PLGA NPs and PM&EM NPs, measured at 540 nm (mean  $\pm$  SD,  $n = 3$ ). Cell viability of fibroblasts (**c**), ECs (**d**), SMCs (**e**), and macrophages (**f**) after incubation with various doses of PLGA nanoparticles and PM&EM NPs for 24 h measured by CCK-8 (mean  $\pm$  SD,  $n = 8$ ). \*\*\* $p < 0.001$ , n.s. = not significant, one-way ANOVA, Tukey's multiple comparison test.

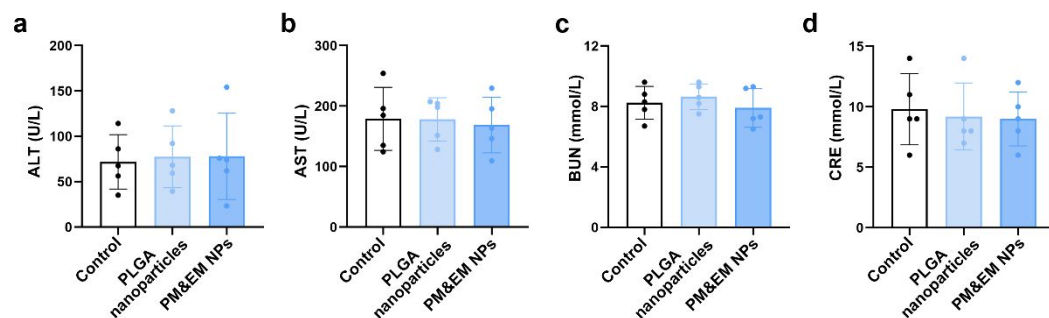

**Figure S4** Biochemical markers relevant to hepatic and kidney function (mean  $\pm$  SD,  $n = 5$  independent experiments). one-way ANOVA, Tukey's multiple comparison test.

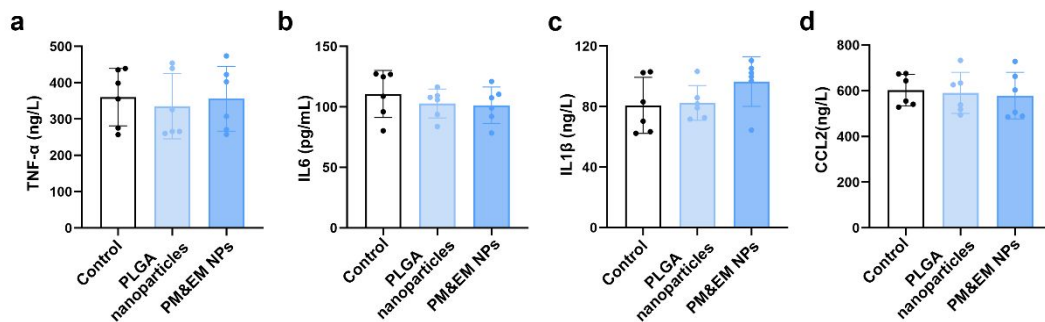

**Figure S5** Mouse serum cytokines relevant to inflammation. (mean  $\pm$  SD, n = 6 independent experiments). one-way ANOVA, Tukey's multiple comparison test.

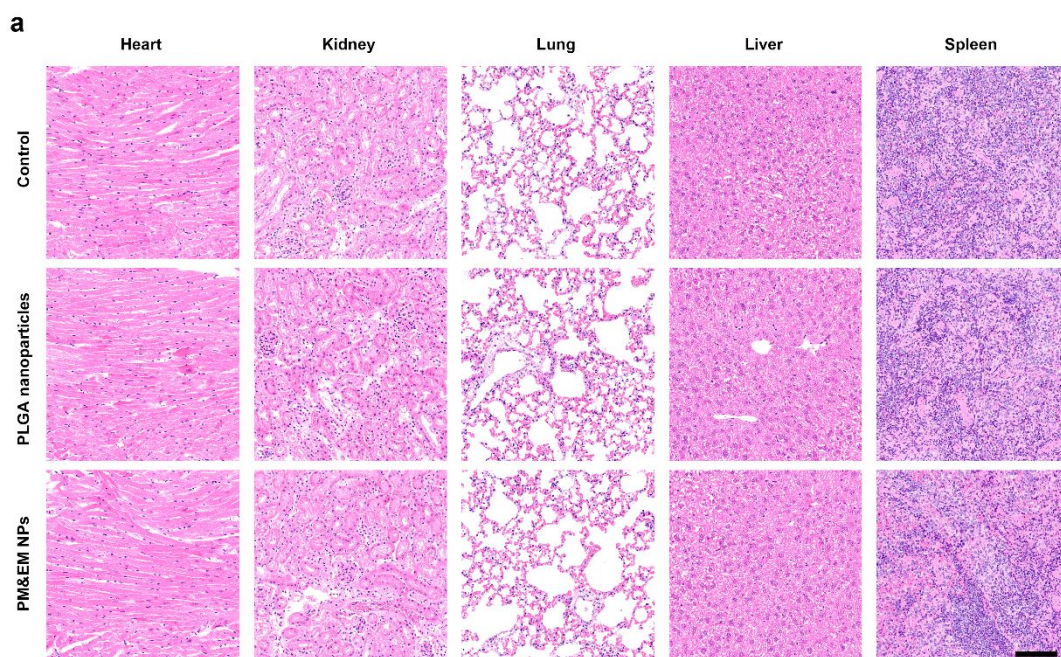

**Figure S6** H&E staining of the main organs collected from the mice treated with PLGA nanoparticles and PM&EM NPs (scale bar = 100  $\mu$ m).

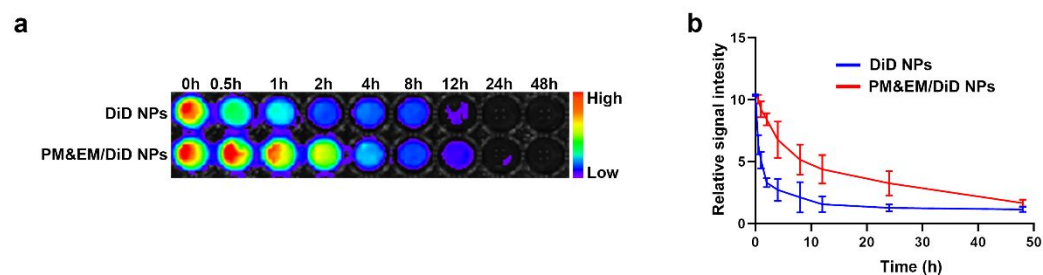

**Figure S7** (a) and (b) Relative fluorescence intensity of DiD NPs and PM&EM/DiD NPs in blood. (mean  $\pm$  SD, n = 3).

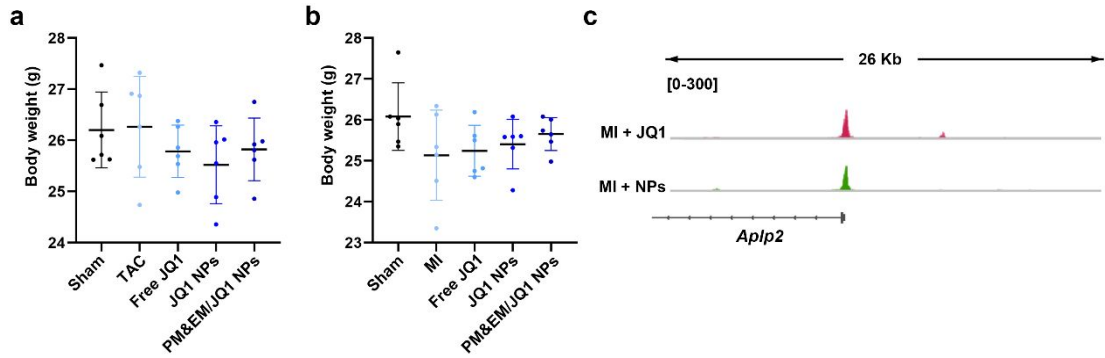

**Figure S8** The body weights of the mice for both TAC (a) and MI (b) experiments (mean  $\pm$  SD,  $n = 6$ ). (c) ATAC-seq from the fibrosis sites of MI mouse with free JQ1 and PM&EM/JQ1 NPs therapy at the *Apfp2* locus.

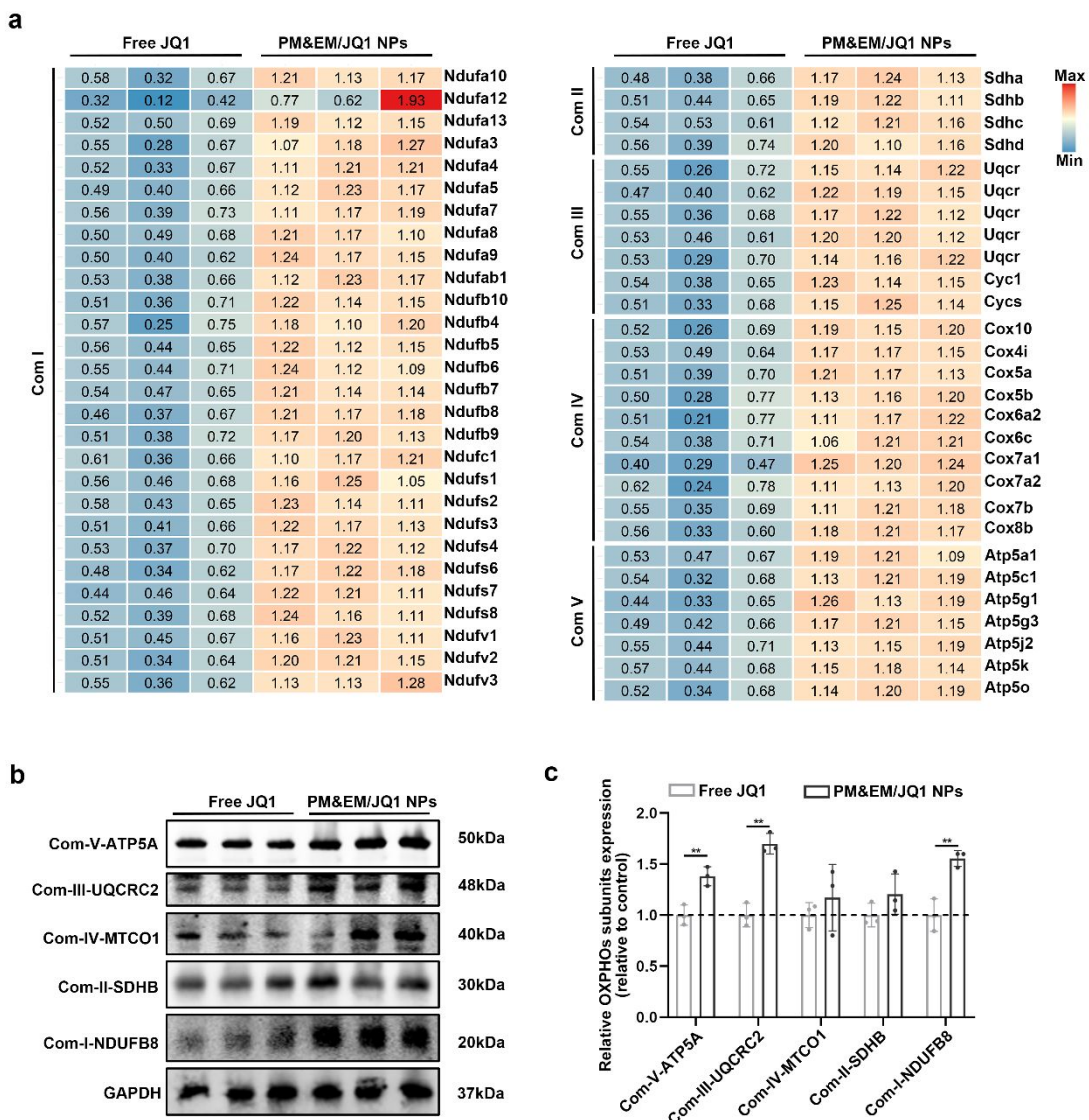

**Figure S9** (a) Heatmap demonstrating mean normalized expression of transcripts encoding the subunits of the mitochondrial respiratory chain. (b) and (c) Western blots of oxidative phosphorylation (OXPHOS) complexes in Free JQ1 and PM&EM/JQ1 NPs group. (mean  $\pm$  SD,  $n = 3$  independent experiments).  $**p < 0.01$ , one-way ANOVA, Tukey's multiple comparison test

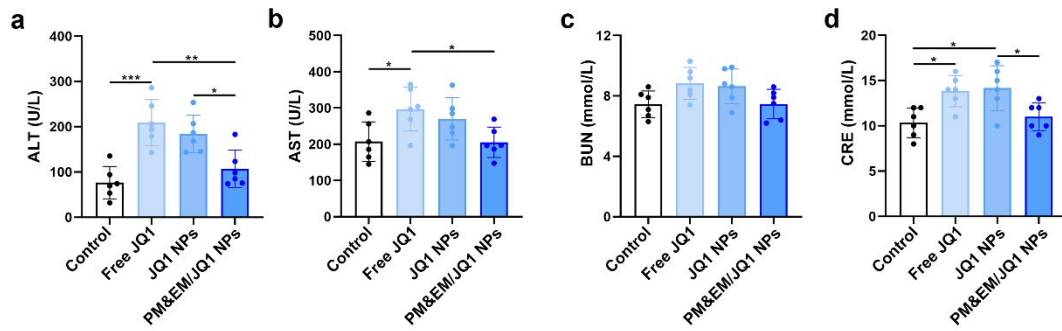

**Figure S10** Biochemical markers relevant to hepatic and kidney function (mean  $\pm$  SD,  $n = 6$  independent experiments). \* $p < 0.05$ , \*\* $p < 0.01$ , and \*\*\* $p < 0.001$ , one-way ANOVA, Tukey's multiple comparison test.

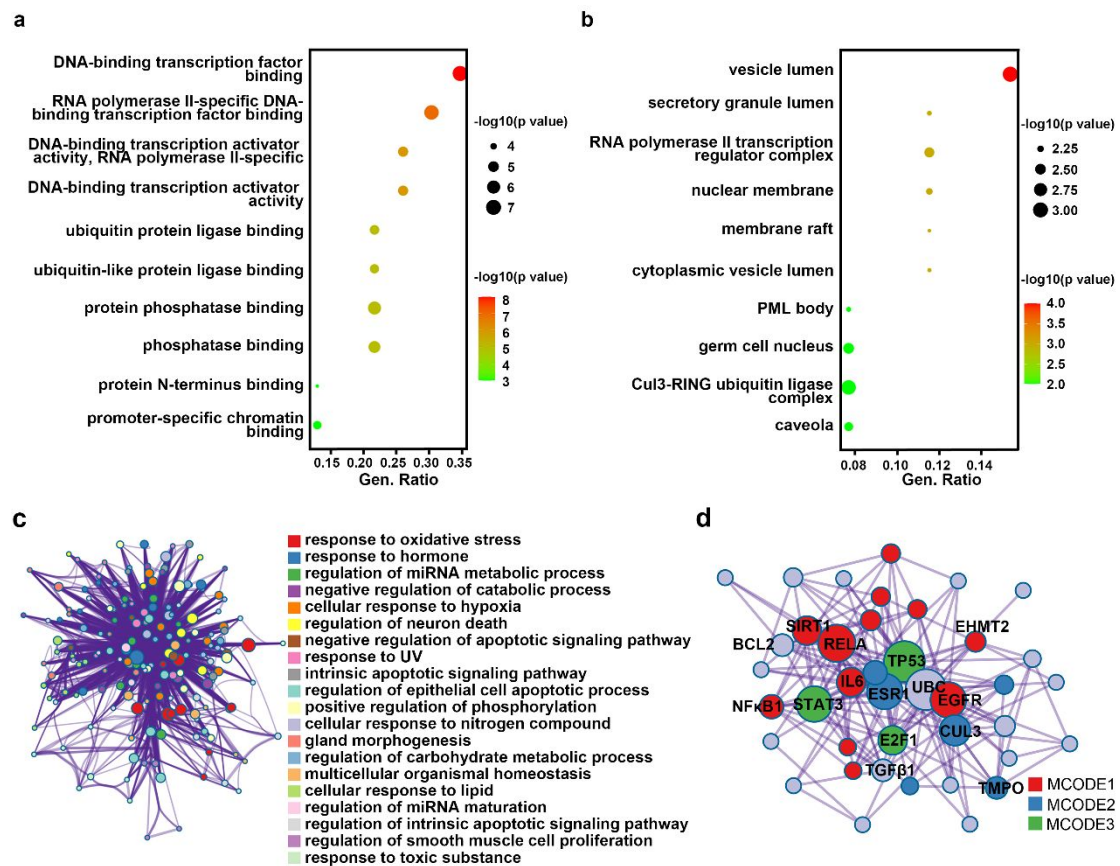

**Figure S11 a and b** GO pathway enrichment analysis (Molecular Function, MF and Cellular Component, CC) of the common gene from different groups by R. **c** GO pathway enrichment analysis of the common gene from different groups by Metascape. **d** The key regulatory molecules of the significant enrichment pathways.

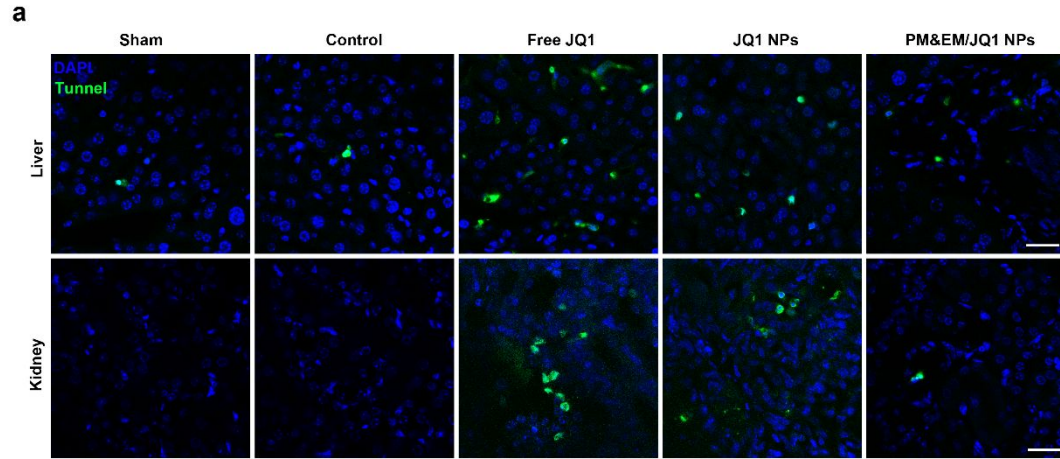

**Figure S12** Representative cross sections from liver and kidney stained with TUNNEL staining, scale bar = 20  $\mu\text{m}$ .

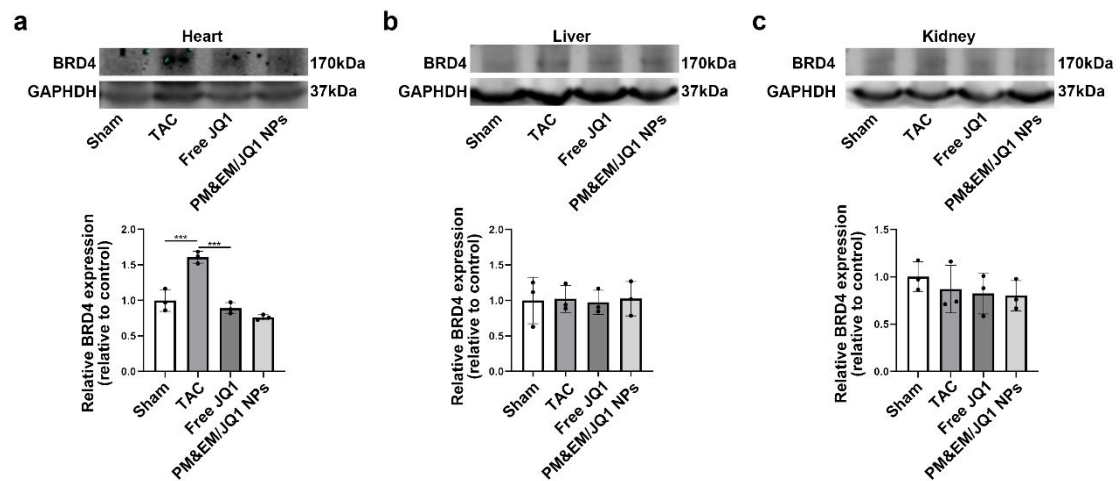

**Figure S13** Western blots of BRD4 in TAC, Free JQ1 and PM&EM/JQ1 NPs-treated mouse heart (a), liver (b) and kidney (c). (mean  $\pm$  SD,  $n = 3$  independent experiments). \*\*\* $p < 0.001$ , one-way ANOVA, Tukey's multiple comparison test.

| JQ1 | PLGA monomer | PLGA nanoparticles | JQ1 NPs | PM&EM NPs | PM&EM/JQ1 NPs |
|-----|--------------|--------------------|---------|-----------|---------------|
|     |              |                    |         |           |               |

**Table S1.** Illustrated explanations of the main abbreviations.

|       |                                                  |
|-------|--------------------------------------------------|
| BRD4  | bromodomain-containing protein 4                 |
| MI    | myocardial infarction                            |
| BET   | bromodomain and extraterminal domain             |
| PM&EM | platelet membrane- erythrocytes membrane complex |
| FRET  | Förster resonance energy transfer                |
| DLS   | Dynamic light scattering                         |
| TEM   | Transmission electron microscopy                 |
| CLSM  | confocal laser scanning microscopy               |
| PCA   | Principal component analysis                     |
| LE    | loading rate                                     |
| EE    | encapsulation rate                               |
| FBS   | fetal bovine serum                               |
| FC    | flow cytometry                                   |
| ECs   | endothelial cells                                |
| SMCs  | smooth muscle cells                              |
| CCK-8 | Cell Counting Kit-8                              |
| ALT   | Alanine Transaminase                             |
| AST   | Aspartate Aminotransferase                       |
| BUN   | blood urea nitrogen                              |
| CRE   | creatinine                                       |
| TAC   | transverse aortic constriction                   |
| MPS   | mononuclear phagocyte system                     |
| ROS   | reactive oxygen species                          |

**Table S2.** Abbreviations in this manuscript.
